# Supplementary material for: Diet-Wide Association Study for the Incidence of Type 2 Diabetes Mellitus in Community-Dwelling Adults Using the UK Biobank Data
Source: MDPI journal article supplement (doi:10.3390/nu16010103), 2023-12-28
Supplement: s1 [file s1]

## **Supplementary Information**

**Table S1.** Dietary foods and nutrients information.

**Figure S1.** Forest plot for the association between dietary food and nutrient factors and T2DM risk in Model 1-3.

**Figure S2.** Sensitivity analysis for subjects who participated  $\geq 3$  times dietary assessments.

**Figure S3.** Sensitivity analysis excluding participants with nutrient intake among the top/bottom 1%.

**Figure S4.** Kaplan-Meier survival curves.

**Table S1a. Dietary food information.**

| Category | Variable (Unit)                                                                |
|----------|--------------------------------------------------------------------------------|
| Grain    | Couscous (Serving)                                                             |
| Grain    | Other cooked grains (e.g. bulgur wheat, millet or pearl barley) (Serving)      |
| Grain    | Rice (White) (Serving)                                                         |
| Grain    | Rice (Brown) (Serving)                                                         |
| Grain    | Snack pot (Serving)                                                            |
| Grain    | Sushi (Sushi)                                                                  |
| Grain    | Pasta (White) (Serving)                                                        |
| Grain    | Pasta (Wholemeal) (Serving)                                                    |
| Grain    | Bran cereals (bowl)                                                            |
| Grain    | Muesli (bowl)                                                                  |
| Grain    | Oat cereal (bowl)                                                              |
| Grain    | Other cereal (bowl)                                                            |
| Grain    | Other sweetened cereals (bowl)                                                 |
| Grain    | Plain cereals (bowl)                                                           |
| Grain    | Porridge (bowl)                                                                |
| Grain    | Wholewheat cereals (bowl)                                                      |
| Grain    | Baguette (Mixed) (Bread item)                                                  |
| Grain    | Baguette (Other) (Bread item)                                                  |
| Grain    | Baguette (Seeded) (Bread item)                                                 |
| Grain    | Baguette (White) (Bread item)                                                  |
| Grain    | Baguette (Wholemeal) (Bread item)                                              |
| Grain    | Bap (Mixed) (Bread item)                                                       |
| Grain    | Bap (Other) (Bread item)                                                       |
| Grain    | Bap (Seeded) (Bread item)                                                      |
| Grain    | Bap (White) (Bread item)                                                       |
| Grain    | Bap (Wholemeal) (Bread item)                                                   |
| Grain    | Bread roll (Mixed) (Bread item)                                                |
| Grain    | Bread roll (Other) (Bread item)                                                |
| Grain    | Bread roll (Seeded) (Bread item)                                               |
| Grain    | Bread roll (White) (Bread item)                                                |
| Grain    | Bread roll (Wholemeal) (Bread item)                                            |
| Grain    | Sliced bread (Mixed) (Slice)                                                   |
| Grain    | Sliced bread (Other) (Bread item)                                              |
| Grain    | Sliced bread (Seeded) (Bread item)                                             |
| Grain    | Sliced bread (White) (Bread item)                                              |
| Grain    | Sliced bread (Wholemeal) (Bread item)                                          |
| Grain    | Baguette (Butter) (Bread item)                                                 |
| Grain    | Bap (Butter) (Bread item)                                                      |
| Grain    | Bread roll (Butter) (Bread item)                                               |
| Grain    | Crackers (Butter) (Biscuit)                                                    |
| Grain    | Crispbread (Biscuit/item)                                                      |
| Grain    | Garlic bread (Slice)                                                           |
| Grain    | Naan bread (Bread item)                                                        |
| Grain    | Oatcakes (Biscuit)                                                             |
| Grain    | Oatcakes (Butter) (Biscuit)                                                    |
| Grain    | Other bread (e.g. crumpets, tortilla wraps, breadsticks) (Slice/item)          |
| Grain    | Other bread (e.g. crumpets, tortilla wraps, breadsticks) (Butter) (Slice/item) |

|           |                                                                                   |
|-----------|-----------------------------------------------------------------------------------|
| Grain     | Slice bread (Butter) (Slice)                                                      |
| Vegetable | Avocado (Medium avocado)                                                          |
| Vegetable | Beans (baked beans) (Serving)                                                     |
| Vegetable | Beans (broad beans) (Serving)                                                     |
| Vegetable | Beans (green, French, runner) (Serving)                                           |
| Vegetable | Beetroot (Serving)                                                                |
| Vegetable | Broccoli (Serving)                                                                |
| Vegetable | Butternut squash (Serving)                                                        |
| Vegetable | Cabbage, greens, kale (Serving)                                                   |
| Vegetable | Carrot (fresh, frozen, raw, cooked) (Serving)                                     |
| Vegetable | Cauliflower (Serving)                                                             |
| Vegetable | Celery (Stick)                                                                    |
| Vegetable | Coleslaw or other salad vegetables in mayonnaise (e.g. waldorf salad) (Serving)   |
| Vegetable | Courgette (Serving)                                                               |
| Vegetable | Cucumber (1 inch/2.5cm)                                                           |
| Vegetable | Garlic (Clove)                                                                    |
| Vegetable | Leeks (Serving)                                                                   |
| Vegetable | Lettuce (Serving)                                                                 |
| Vegetable | Mixed side salad (Serving)                                                        |
| Vegetable | Mixed vegetables (e.g. frozen mixed vegetable)                                    |
| Vegetable | Mushrooms (Serving)                                                               |
| Vegetable | Onion (red, white, pickled, shallots, spring) (Serving)                           |
| Vegetable | Other vegetables (e.g. celeriac, asparagus, fennel, aubergine, pumpkin) (Serving) |
| Vegetable | Parsnip (Serving)                                                                 |
| Vegetable | Peas (frozen, fresh, tinned) (Serving)                                            |
| Vegetable | Peppers (Sweet) (Whole pepper)                                                    |
| Vegetable | Potatoes (fried, chips, wedges, roast) (Serving)                                  |
| Vegetable | Potatoes (Baked, boiled) (Serving)                                                |
| Vegetable | Potatoes (mashed) (Serving)                                                       |
| Vegetable | Pulses (Serving)                                                                  |
| Vegetable | Spinach (Serving)                                                                 |
| Vegetable | Sprouts (Serving)                                                                 |
| Vegetable | Sweet potatoes (Serving)                                                          |
| Vegetable | Sweetcorn (tinned or frozen, or corn on the cob) (Serving)                        |
| Vegetable | Tomatoes (fresh) (Medium tomato)                                                  |
| Vegetable | Tomatoes (cooked or tinned) (Serving)                                             |
| Vegetable | Turnip or swede (Serving)                                                         |
| Vegetable | Vegetable pieces (too small to be counted as individual vegetable) (Serving)      |
| Vegetable | Watercress (Serving)                                                              |
| Vegan     | Other vegetarian alternative (Serving)                                            |
| Vegan     | Quon (Serving)                                                                    |
| Vegan     | Tofu (Serving)                                                                    |
| Vegan     | Vegetarian sausage (Each)                                                         |
| Fruit     | Apple (Whole fruit)                                                               |
| Fruit     | Banana (Whole fruit)                                                              |
| Fruit     | Berries (Handful)                                                                 |
| Fruit     | Cherries (Handful)                                                                |
| Fruit     | Dried fruit (Handful)                                                             |
| Fruit     | Grape (Handful)                                                                   |

|          |                                                                                   |
|----------|-----------------------------------------------------------------------------------|
| Fruit    | Grapefruit (Whole fruit/serving)                                                  |
| Fruit    | Mango (Serving)                                                                   |
| Fruit    | Melon (Serving)                                                                   |
| Fruit    | Mixed fruit (Serving)                                                             |
| Fruit    | Orange (Whole fruit)                                                              |
| Fruit    | Orange-like small fruits e.g. satsuma, clementine, mandarin (Whole fruit/serving) |
| Fruit    | Other fruit e.g. pomegranate, kiwi, papaya (Whole fruit/serving)                  |
| Fruit    | Peach, nectarine (Whole fruit/serving)                                            |
| Fruit    | Pear (Whole fruit/serving)                                                        |
| Fruit    | Pineapple (Serving)                                                               |
| Fruit    | Plum (Whole fruit)                                                                |
| Fruit    | Prunes (Handful)                                                                  |
| Fruit    | Stewed/cooked fruit e.g. apple, rhubarb, plums (Serving)                          |
| Pastries | Cake, muffin, flapjack, brownie, pecan pie (Slice/Item)                           |
| Pastries | Cheesecake (Serving)                                                              |
| Pastries | Croissant (Pastry)                                                                |
| Pastries | Crumble topping (Serving)                                                         |
| Pastries | Danish pastry (Pastry)                                                            |
| Pastries | Double crust pie (Slice/Item)                                                     |
| Pastries | Doughnuts (Item)                                                                  |
| Pastries | Fruit cake (Slice)                                                                |
| Pastries | Ice cream (Serving/Individual ice cream)                                          |
| Pastries | Indian snacks (Item)                                                              |
| Pastries | Milk pudding (Serving/Individual pot)                                             |
| Pastries | Other dessert (Serving/Individual pot)                                            |
| Pastries | Other milk based desserts (Serving/Individual pot)                                |
| Pastries | Pancake (Pancake)                                                                 |
| Pastries | Pizza (Medium slice)                                                              |
| Pastries | Scone (Scone)                                                                     |
| Pastries | Scotch pancake (Pancake)                                                          |
| Pastries | Single crust pastry (Slice/Item)                                                  |
| Pastries | Soya dessert (Serving/Individual pot)                                             |
| Pastries | Sponge pudding (Serving)                                                          |
| Pastries | Yorkshire pudding (Muffin-sized pudding/Serving)                                  |
| Snack    | Cereal bars (Bar [~50g])                                                          |
| Snack    | Cheesy biscuits (Handful/Bag)                                                     |
| Snack    | Chocolate bar (Bar [~50g])                                                        |
| Snack    | Chocolate biscuits (Biscuit)                                                      |
| Snack    | Chocolate covered biscuits (Biscuit)                                              |
| Snack    | Chocolate covered raisins (Handful)                                               |
| Snack    | Chocolate sweets (Handful)                                                        |
| Snack    | Crisps (Small bag)                                                                |
| Snack    | Dark chocolate (Bar [~50g])                                                       |
| Snack    | Diet sweets (Handful)                                                             |
| Snack    | Milk chocolate (Bar [~50g])                                                       |
| Snack    | Olives (Handful)                                                                  |
| Snack    | Other savoury snack (Handful/Bag)                                                 |
| Snack    | Other sweets snack (Handful/Item)                                                 |
| Snack    | Salted nuts (Handful)                                                             |

|                    |                                                                                                 |
|--------------------|-------------------------------------------------------------------------------------------------|
| Snack              | Salted peanuts (Handful)                                                                        |
| Snack              | Savoury biscuits (Bag)                                                                          |
| Snack              | Seeds (Handful)                                                                                 |
| Snack              | Sweet biscuits (Biscuit)                                                                        |
| Snack              | Sweets (Handful)                                                                                |
| Snack              | Unsalted nuts (Handful)                                                                         |
| Snack              | Unsalted peanuts (Handful)                                                                      |
| Snack              | White chocolate (Bar [~50g])                                                                    |
| Soup               | Canned soup (Bowl)                                                                              |
| Soup               | Home-made soup (Bowl)                                                                           |
| Soup               | Powered soup (Mug/Bowl)                                                                         |
| Meat/fish          | Bacon (Rasher)                                                                                  |
| Meat/fish          | Beef (Serving)                                                                                  |
| Meat/fish          | Ham (Slice)                                                                                     |
| Meat/fish          | Lamb (Serving)                                                                                  |
| Meat/fish          | Liver (Serving)                                                                                 |
| Meat/fish          | Other meat (Serving)                                                                            |
| Meat/fish          | Pork (Serving)                                                                                  |
| Meat/fish          | Poultry (Crumbed or deep-fried) (Serving)                                                       |
| Meat/fish          | Poultry (Serving)                                                                               |
| Meat/fish          | Sausage (Each)                                                                                  |
| Meat/fish          | Battered fish (Serving)                                                                         |
| Meat/fish          | Breaded fish (e.g. fish fingers) or fish cakes (Serving)                                        |
| Meat/fish          | Lobster or crab (Serving)                                                                       |
| Meat/fish          | Oily fish (e.g. salmon, tinned salmon, herring, mackerel, sardines, fresh tuna steak) (Serving) |
| Meat/fish          | Other fish (Serving)                                                                            |
| Meat/fish          | Prawns (Serving)                                                                                |
| Meat/fish          | Shellfish (e.g. mussels, scallops) (Serving)                                                    |
| Meat/fish          | Tinned tuna (Serving)                                                                           |
| Meat/fish          | White fish (e.g. cod, haddock, fish pie)                                                        |
| Diary product/eggs | Egg in sandwiches (Serving)                                                                     |
| Diary product/eggs | Omelettes (Serving)                                                                             |
| Diary product/eggs | Other egg dishes (Serving)                                                                      |
| Diary product/eggs | Scotch egg (Each)                                                                               |
| Diary product/eggs | Whole eggs (Number of eggs)                                                                     |
| Diary product/eggs | Blue cheese (Serving)                                                                           |
| Diary product/eggs | Cottage cheese (Serving)                                                                        |
| Diary product/eggs | Feta (Serving)                                                                                  |
| Diary product/eggs | Goat cheese (Serving)                                                                           |
| Diary product/eggs | Hard cheese (Serving)                                                                           |
| Diary product/eggs | Low fat hard cheese (Serving)                                                                   |
| Diary product/eggs | Low fat spreadable cheese (Serving)                                                             |
| Diary product/eggs | Milk (Excluding milkshakes) (Glass/Carton/250ml)                                                |
| Diary product/eggs | Mozzarella (Serving)                                                                            |
| Diary product/eggs | Other cheese (Serving)                                                                          |
| Diary product/eggs | Soft cheese (Serving)                                                                           |
| Diary product/eggs | Spreadable cheese (Serving)                                                                     |
| Diary product/eggs | Yogurt (Serving/Individual pot)                                                                 |
| Beverages          | Green tea (Mug/Cup)                                                                             |

|                     |                                                                         |
|---------------------|-------------------------------------------------------------------------|
| Beverages           | Herbal or fruit tea (infusion) (Mug/Cup)                                |
| Beverages           | Other tea/infusion (Mug/Cup)                                            |
| Beverages           | Rooibos/Redbush tea (e.g. Tick Tock) (Mug/Cup)                          |
| Beverages           | Standard tea (e.g. Tetley, PG Tips, Assam, Darjeeling) (Mug/Cup)        |
| Beverages           | Cappuccino (Mug/Cup)                                                    |
| Beverages           | Espresso (Cup)                                                          |
| Beverages           | Filter coffee (Mug/Cup)                                                 |
| Beverages           | Instant coffee (Mug/Cup)                                                |
| Beverages           | Latte (Mug/Cup)                                                         |
| Beverages           | Other coffee drinks (Mug/Cup)                                           |
| Beverages           | Carbonated (fizzy) drinks (Glass/Can)                                   |
| Beverages           | Dairy/yogurt based smoothie (Glass/Bottle/250ml)                        |
| Beverages           | Fruit smoothie (Glass/Bottle/250ml)                                     |
| Beverages           | Fruit drinks, J2O, squash or cordial (Glass/Carton/250ml)               |
| Beverages           | Hot chocolate or other milk-based drinks (including Horlicks) (Mug/Cup) |
| Beverages           | Low calorie hot chocolate drinks (Mug/Cup)                              |
| Beverages           | Low calorie or diet drinks (e.g. fizzy, squash) (Glass/Can)             |
| Beverages           | Other drinks (Glass/Mug/Cup)                                            |
| Beverages           | Other pure fruit/vegetable juice (Glass/Carton/250ml)                   |
| Beverages           | Pure grapefruit juice (Glass/Carton/250ml)                              |
| Beverages           | Pure orange juice (Glass/Carton/250ml)                                  |
| Beverages           | Water (Glass/Beaker)                                                    |
| Beverages           | Yogurt drinks, flavoured milk or milkshakes (Glass/Carton/250ml)        |
| Alcoholic beverages | Alcohol (ml)                                                            |
| Alcoholic beverages | Beer/cider (ml)                                                         |
| Alcoholic beverages | Fortified wine (ml)                                                     |
| Alcoholic beverages | Other alcohol drinks (ml)                                               |
| Alcoholic beverages | Red wine (ml)                                                           |
| Alcoholic beverages | Rose wine (ml)                                                          |
| Alcoholic beverages | Spirits (Measure)                                                       |
| Alcoholic beverages | White wine (ml)                                                         |

**Table S1b. Dietary nutrient information.**

| Variable (unit)                                |
|------------------------------------------------|
| Calcium (mg/day)                               |
| Carbohydrate (% of energy intake/day)          |
| Carotene (µg/day)                              |
| Energy (kj/day)                                |
| Fat (% of energy intake/day)                   |
| Fibre (g/day)                                  |
| Folate (µg/day)                                |
| Iron (mg/day)                                  |
| Magnesium (mg/day)                             |
| Potassium (mg/day)                             |
| Protein (% of energy intake/day)               |
| Polyunsaturated fat (% of energy intake/day)   |
| Retinol (µg/day)                               |
| Saturated fatty acids (% of energy intake/day) |
| Starch (g/day)                                 |
| Sugar (g/day)                                  |
| Vitamin B12 (mg/day)                           |
| Vitamin B6 (mg/day)                            |
| Vitamin C (mg/day)                             |
| Vitamin D (µg/day)                             |
| Vitamin E (mg/day)                             |

**Figure S1.** Forest plot for the association between dietary food and nutrient factors and T2DM risk in Model 1-3.

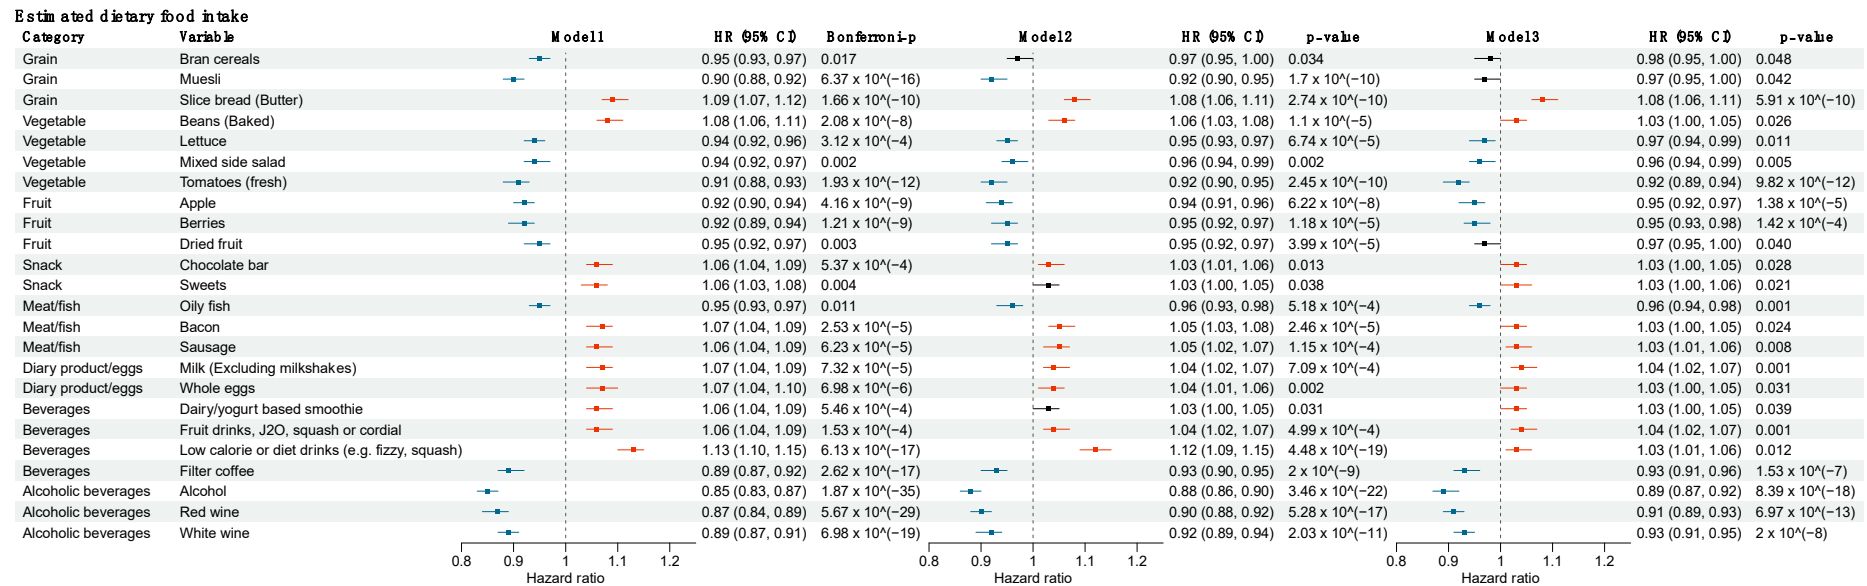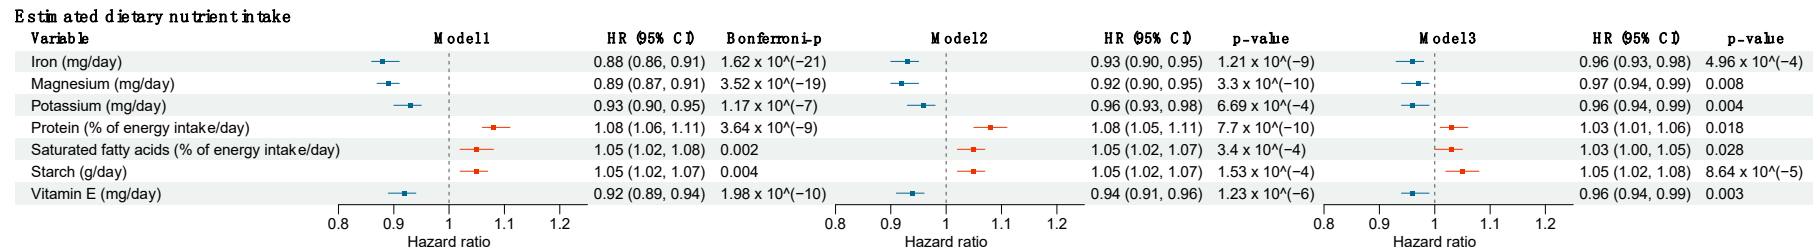

**Figure S1.** Forest plot for the association between dietary food factors and T2DM risk (a) and the association between dietary nutrient factors and T2DM risk (b) in Model 1-3. Abbreviation: HR, hazard ratio; CI, confidence interval. The HR represents the increased T2DM risk for each quintile increase in dietary factor consumption. Model 1 is adjusted for gender and age at recruitment. Model 2 is adjusted for ethnic background, smoking

status, physical activity, education level, and Townsend index. Model 3 is further adjusted for BMI, HbA1c, blood cholesterol, medication for blood pressure and exogenous hormone, and medical condition of hypertension. For Models 2 and 3, non-alcoholic dietary food and nutrient variables were additionally adjusted for alcohol intake. Negative associations are depicted in blue, while positive associations are shown in red. Factors that are significant in both Model 1 and Model 2 will be highlighted in Model 2. Factors that are significant in all models will be highlighted in the Model 3 column. Negative associations are depicted in blue, while positive associations are shown in red.

**Figure S2.** Sensitivity analysis for subjects who participated  $\geq 3$  times dietary assessments.

**S2a)**

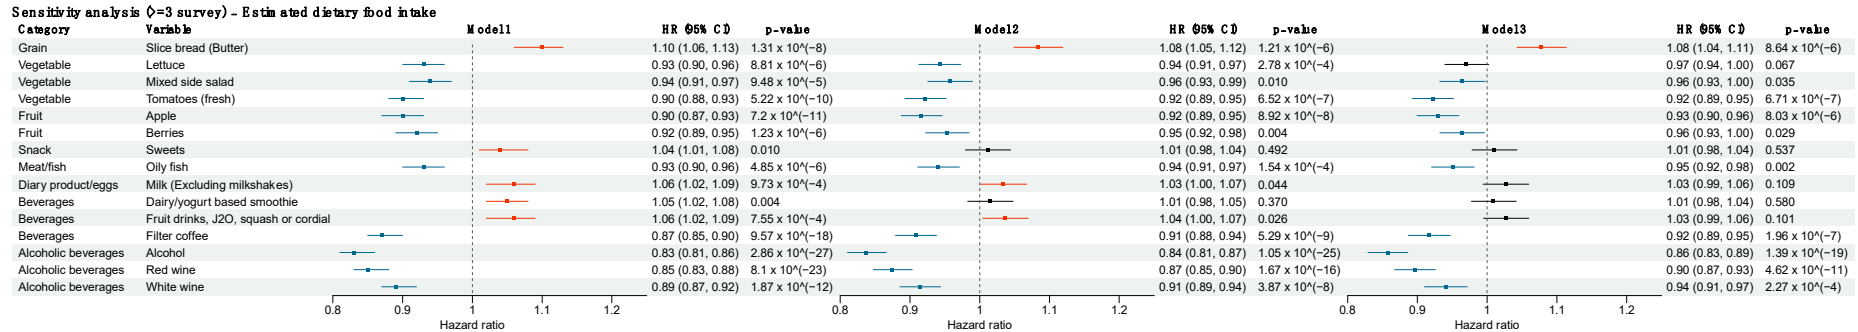

**S2b)**

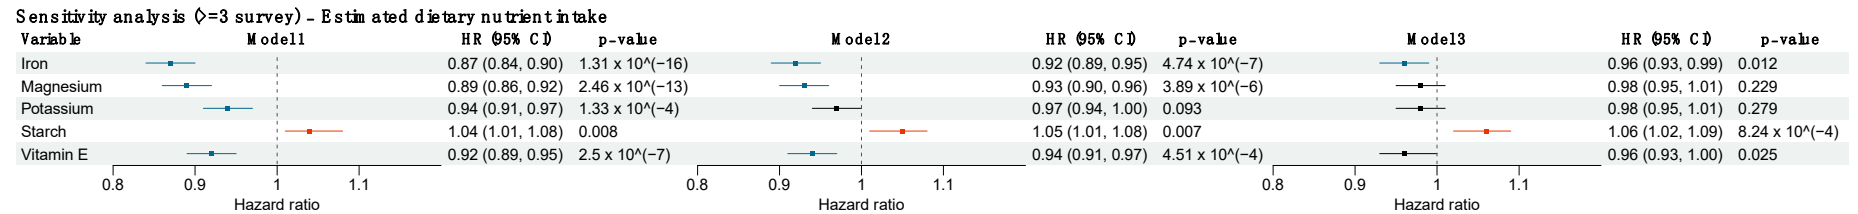

**Figure S2.** Forest plot for the association between significant dietary nutrient factors and T2DM risk (S2a) and the association between significant dietary nutrient factors and T2DM risk (S2b) for subjects who participated  $\geq 3$  times dietary assessments. Abbreviation: HR, Hazard ratio; CI, confidence interval. The HR represents the increased T2DM risk for each quintile increase in dietary factor consumption. Model 1 is adjusted for gender and age at recruitment. Model 2 is additionally adjusted for ethnic background, smoking status, physical activity, education level, and Townsend index. Model 3 is further adjusted for BMI, HbA1c, blood cholesterol, medication for blood pressure and exogenous hormone, and medical condition of hypertension. For Model 2 and 3, non-alcoholic dietary food and nutrient variables were additionally adjusted for alcohol intake. Negative associations are depicted in blue, while positive associations are shown in red. Factors that are significant in both Model 1 and Model 2 will be highlighted in Model 2. Factors that are significant in all models will be highlighted in the Model 3 column.

**Figure S3.** Sensitivity analysis excluding participants with nutrient intake among the top and bottom 1%.

**S3a)**

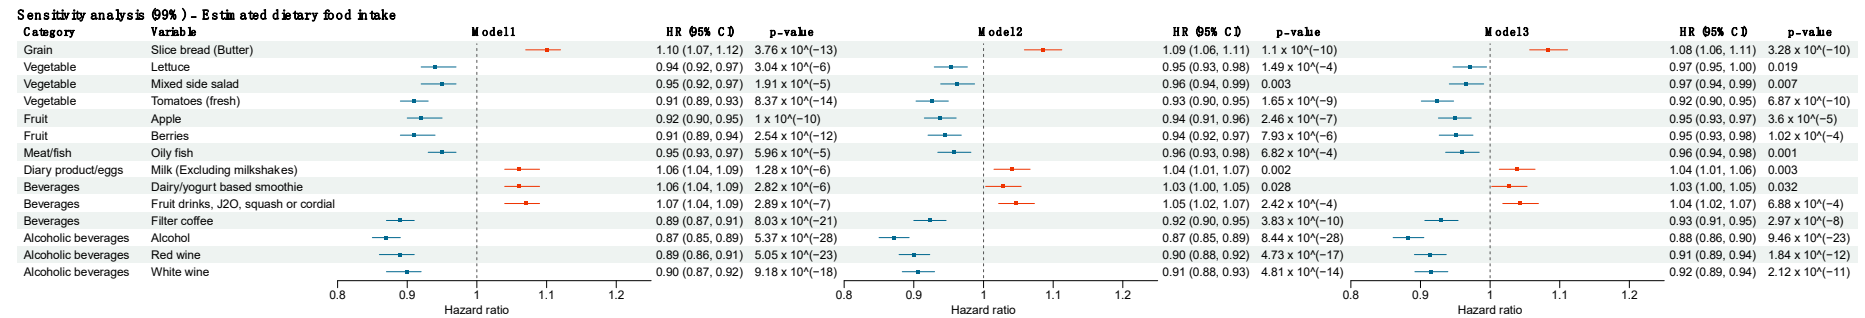

**S3b)**

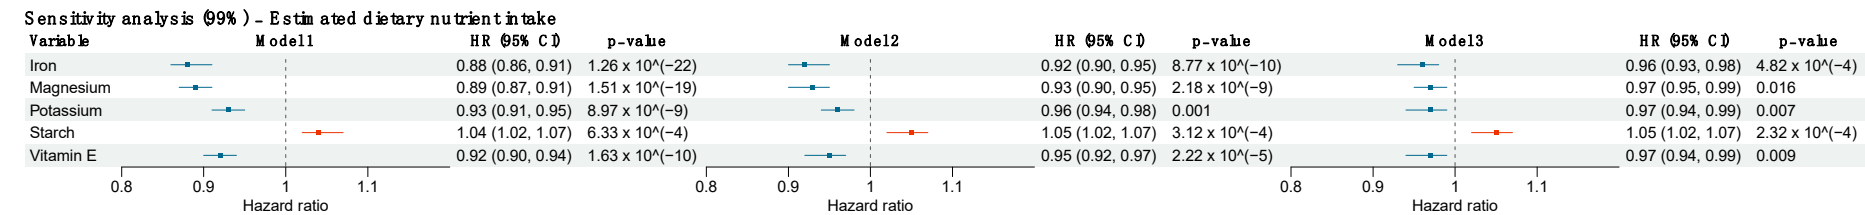

**Figure S3.** Forest plot for the association between significant dietary nutrient factors and T2DM risk (S3a) and the association between significant dietary nutrient factors and T2DM risk (S3b) excluding participants with nutrient intake among the top/bottom 1%. Abbreviation: HR, Hazard ratio; CI, confidence interval. The HR represents the increased T2DM risk for each quintile increase in dietary factor consumption. Model 1 is adjusted for gender and age at recruitment. Model 2 is additionally adjusted for ethnic background, smoking status, physical activity, education level, and Townsend index. Model 3 is further adjusted for BMI, HbA1c, blood cholesterol, medication for blood pressure and exogenous hormone, and medical condition of hypertension. For Model 2 and 3, non-alcoholic dietary food and nutrient variables were additionally adjusted for alcohol intake. Negative associations are depicted in blue, while positive associations are shown in red. Factors that are significant in both Model 1 and Model 2 will be highlighted in Model 2. Factors that are significant in all models will be highlighted in the Model 3 column.

**Figure S4.** Kaplan-Meier survival curves.

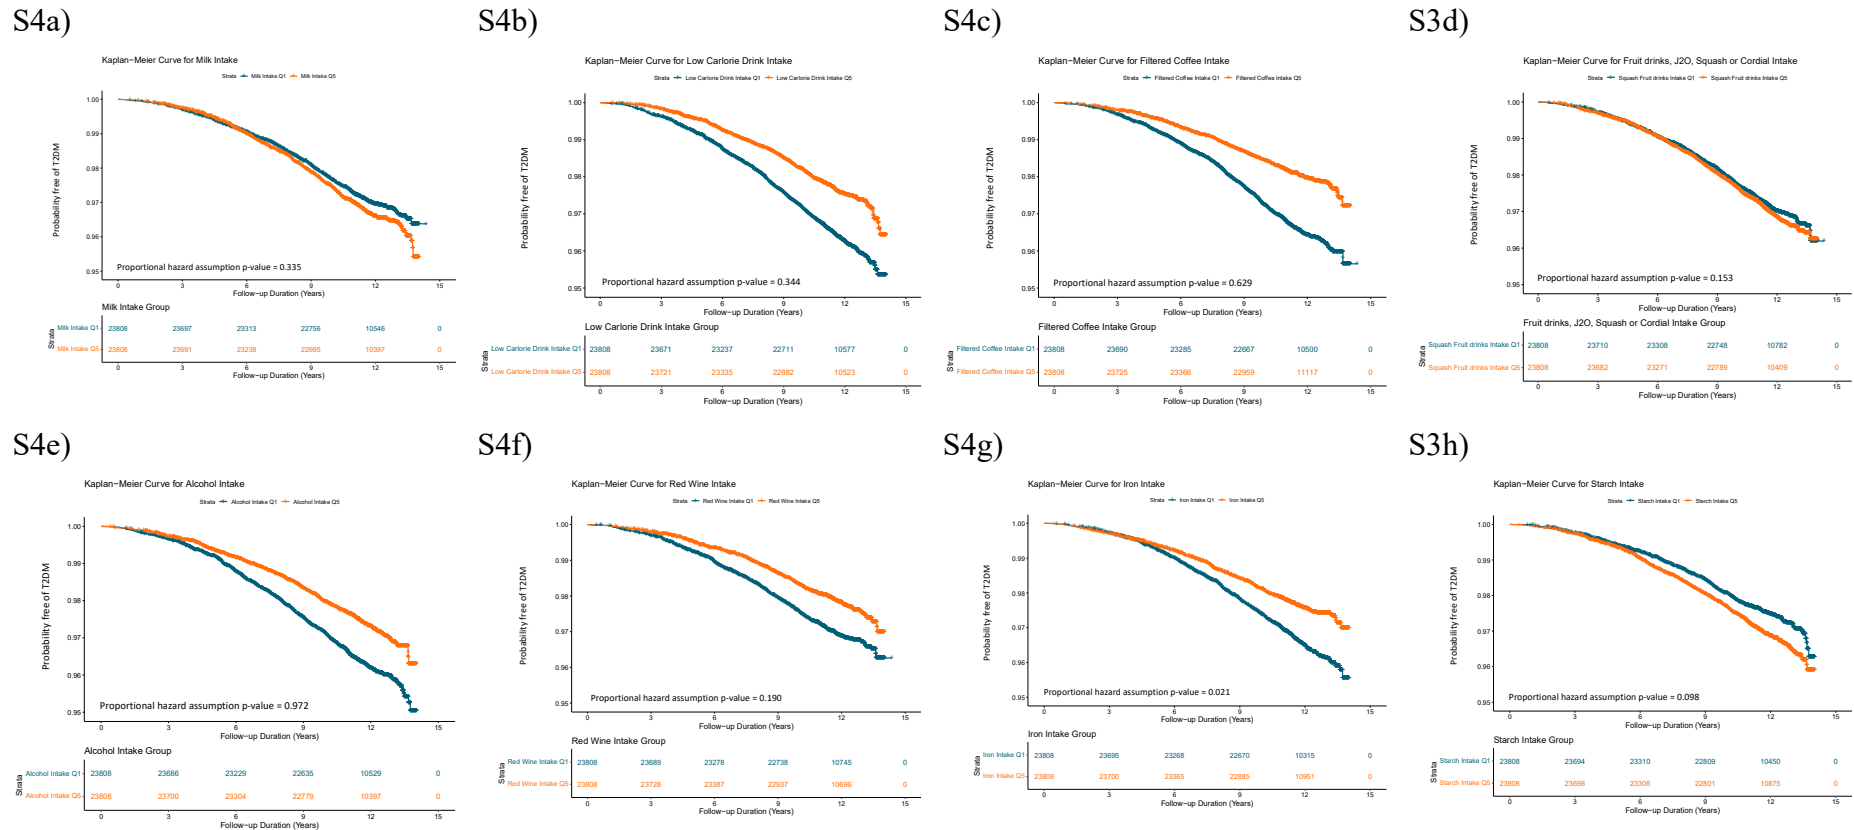

**Figure S4.** Kaplan-Meier survival curves for the onset of T2DM comparing the first and fifth quintiles of various dietary factors. Abbreviation: Q1, Quintile 1; Q5, Quintile 5. Only those dietary factors that are recorded in detail and not categorized by measurement units are shown. The x-axis represents the follow-up time in years, while the y-axis indicates the probability of remaining free from T2DM. The shaded areas represented the 95% confidence intervals. The table below the curves shows the number of participants at risk in different groups at various follow-up times.
